# Supplementary material for: A geopolymer route to micro- and meso-porous carbon
Source: Royal Society of Chemistry journal article supplement (doi:10.1039/c9ra09698a), 2020-01-01
Supplement: c9ra09698a1.pdf [file c9ra09698a1.pdf]

## Electronic Supplementary Information

### Geopolymer Template Route to Micro- and Meso-porous Carbon

Yi-Rong Pei,<sup>a</sup> Jae-Hun Yang,<sup>b</sup> Goeun Choi<sup>c</sup> and Jin-Ho Choy<sup>\*cd</sup>

<sup>a</sup> Department of Chemistry and Nanoscience, Ewha Womans University, Seoul 03760, Korea.

<sup>b</sup> Global Innovative Center for Advanced Nanomaterials (GICAN), School of Engineering, Faculty of Engineering and Built Environment, The University of Newcastle, Callaghan, New South Wales 2308, Australia.

<sup>c</sup> Intelligent Nanohybrid Materials Laboratory (INML), Institute of Tissue Regeneration Engineering (ITREN), Dankook University, Cheonan 31116, Korea.

<sup>d</sup> Tokyo Tech World Research Hub Initiative (WRHI), Institute of Innovative Research, Tokyo Institute of Technology, Yokohama 226-8503, Japan.

E-mail: [jhchoy@dankook.ac.kr](mailto:jhchoy@dankook.ac.kr)

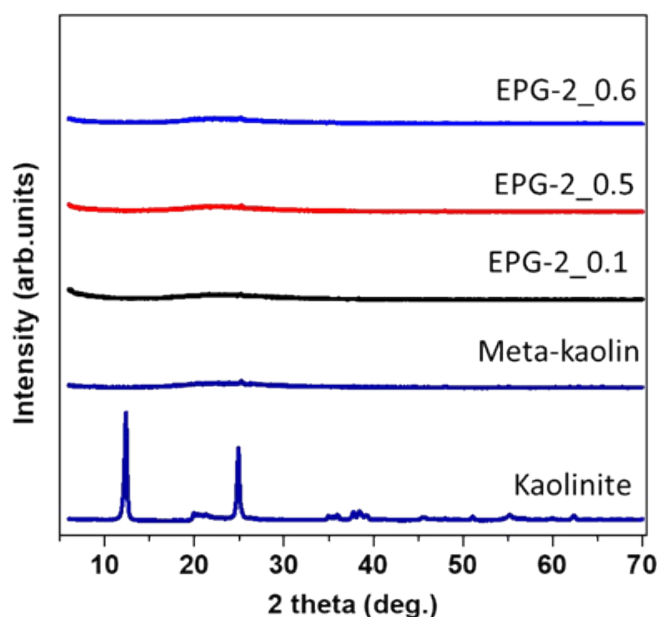

**Figure S1.** Powder x-ray diffraction pattern in wide angle range of kaolinite, meta-kaolin derived through dihydroxylation of kaolinite at 750 °C for 10 h and EPG-2\_0.1, EPG-2\_0.5, EPG-2\_0.6 which were synthesized with the molar ratio of CTAB/(Si+Al) = 0.1, 0.5 and 0.6.

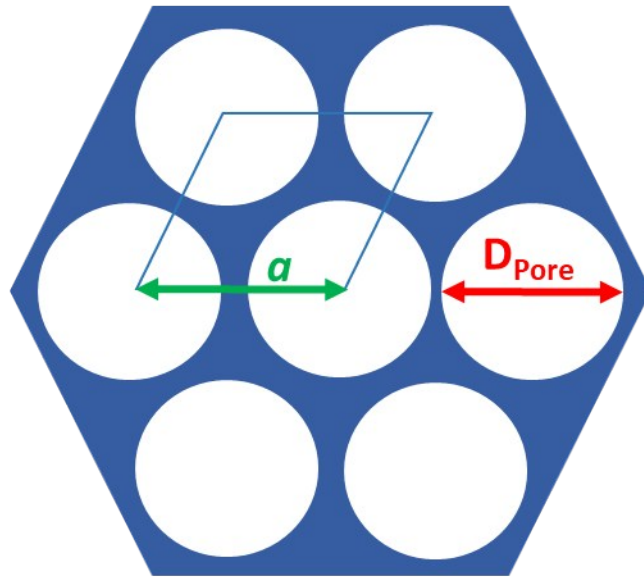

$$\text{Wall thickness} = a - D_{\text{Pore}}$$

**Scheme S1** Structure model of porous geopolymer EPG-2\_0.1.

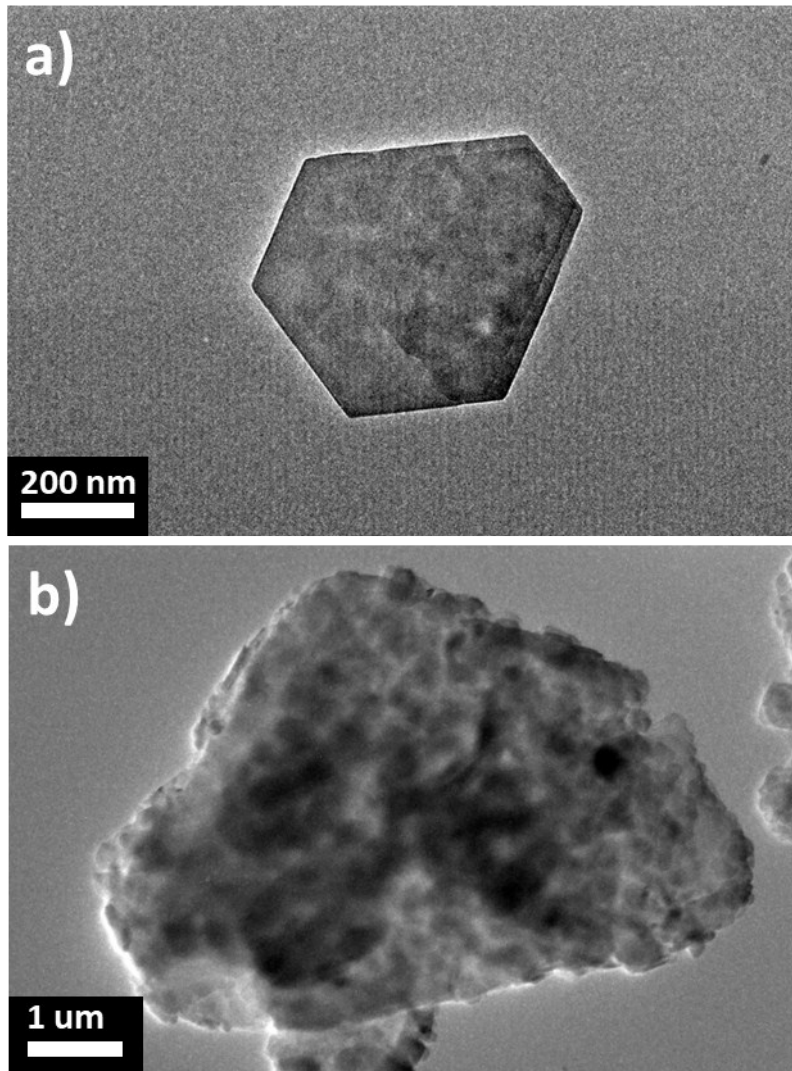

**Figure S2.** TEM images of a) kaolinite and b) meta-kaolin.

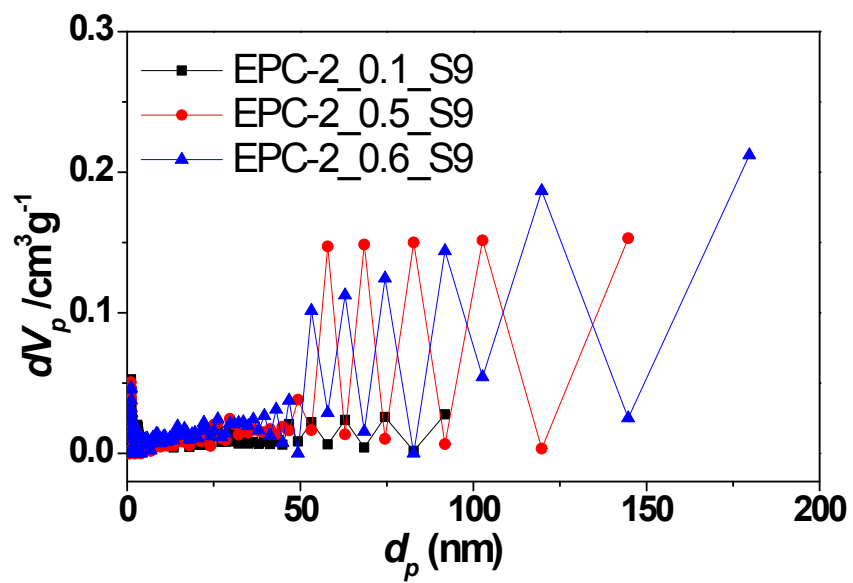

**Figure S3.** NLDFT pore size distribution of EPC-2\_0.1\_S9, EPC-2\_0.5\_S9 and EPC-2\_0.6\_S9 in the pore size range of 0 ~ 200 nm.

**Table S1.** Structural parameters and CO<sub>2</sub> uptakes of EPC-2\_0.1\_S9, EPC-2\_0.5\_S9, EPC-2\_0.6\_S9 and carbon materials from literatures.

|                                   | CO <sub>2</sub> adsorption<br>(mmol/g) | Temperature<br>(K) | Pressure<br>(atm) | Reference |
|-----------------------------------|----------------------------------------|--------------------|-------------------|-----------|
| EPC-2_0.1_S9                      | 3.04                                   | 273                | 1                 | This work |
| EPC-2_0.5_S9                      | 2.77                                   | 273                | 1                 | This work |
| EPC-2_0.6_S9                      | 2.80                                   | 273                | 1                 | This work |
| Porous Carbon (C)                 | 2.8                                    | 273                | 1                 | 1         |
| Mesoporous carbon (CMK-3)         | 1.7                                    | 298                | 1                 | 2         |
| Activated graphite fibres (G-900) | 1.3                                    | 298                | 1                 | 3         |
| Activated carbon                  | < 0.50                                 | 273                | 1                 | 4         |
|                                   | 3.66                                   | 273                | 30                | 4         |
| Multi-walled CNT                  | < 0.50                                 | 273                | 1                 | 4         |
|                                   | 5.63                                   | 273                | 30                | 4         |

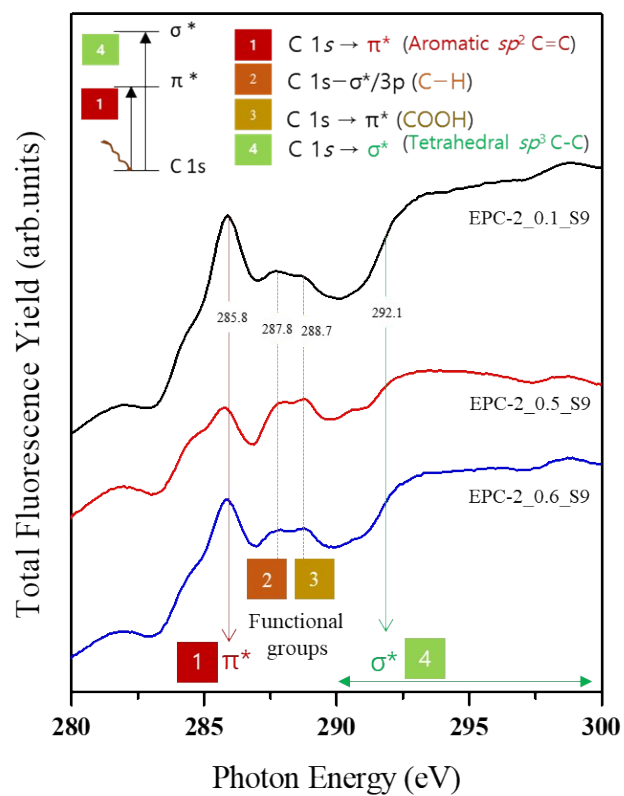

**Figure S4.** Normalized Carbon K-edge XANES spectra of as-prepared porous carbons, EPC-2\_0.1\_S9, EPC-2\_0.5\_S9 and EPC-2\_0.6\_S9.

## References

1. J. Ludwinowicz and M. Jaroniec, *Carbon*, **2015**, *82*, 297.
2. a) M. Sevilla and A. B. Fuertes, *Energy Environ. Sci.*, **2011**, *4*, 1765; b) G. Chandrasekar, W. J. Son and W. S. Ahn, *J. Porous Mater.*, **2009**, *16*, 545.
3. J. Przepiorski, M. Skrodzewicz and A. W. Morawski, *Appl. Surf. Sci.*, **2004**, *225*, 235.
4. K. S. Lakhi, A. V. Baskar, J. S. M. Zaidi, S. S. Al-Deyab, M. E. Newehy, J. -H. Choy and A. Vinu, *RSC Adv.*, **2015**, *5*, 40183.
